# Supplementary material
Source: publisher figshare collection journal article supplement (https://acs.figshare.com/ndownloader/files/4532122)
Supplement: Supplementary file 1 [file 4532122]

*Optimization of mechanical agitation and evaluation of the mass-transfer resistance in the oil transesterification reaction for biodiesel production*

## Supporting Information

**Evaluation of the parameters and mass-transfer coefficients contained in the expressions of the characteristic times of non-polar side and polar-side triglyceride transport ( $t_{T,NP}$ ,  $t_{T,P}$ ) and of triglyceride diffusion in the polar film ( $t_{D,P}$ ).**

The mass-transfer coefficient of triglyceride diffusion in the polar (dispersed) phase,  $k_{TG,P}$ , was evaluated according to Ahn and Lee,<sup>38</sup> and Kronig and Brink:<sup>39</sup>

$$k_{TG,P} = 17.9 \frac{D_{TG,P}}{d_{32}} \quad (\text{SI-1})$$

The diffusivities of triglycerides in the polar and non-polar phases,  $D_{TG,P}$  and  $D_{TG,NP}$ , were evaluated according to Sinnott:<sup>40</sup>

$$D_{TG,P} = 1.173 \cdot 10^{-13} \frac{(1.9M_{TG})^{0.5} g}{1000 \mu_P V_{mol,TG}^{0.6}} \quad (\text{SI-2})$$

$$D_{TG,NP} = 1.173 \cdot 10^{-13} \frac{(1.9M_{TG})^{0.5} g}{1000 \mu_{NP} V_{mol,TG}^{0.6}} \quad (\text{SI-3})$$

$D_{TG,P}$  and  $D_{TG,NP}$  resulted equal respectively to  $8.2 \cdot 10^{-10} \text{ m}^2/\text{s}$  and  $6.8 \cdot 10^{-11} \text{ m}^2/\text{s}$ .

The overall coefficient of triglyceride interfacial transport from the non-polar to the polar phase,  $K_{TG,P}$ , was estimated as:

$$\frac{1}{K_{TG,P}} = \frac{1}{k_{TG,P}} + \frac{1}{m_{TG} \cdot k_{TG,NP}} \quad (\text{SI-4})$$

The triglyceride partition coefficient,  $m_{TG}$ , was estimated as  $\rho_{TG}/s_{TG,P}$ , where  $s_{TG,P}$ , the triglyceride solubility in methanol at 60 °C, was taken equal to 4 g/L according to Boocock et al.<sup>36</sup> The mass-transfer coefficient of triglyceride diffusion in the non-polar (continuous) phase,  $k_{TG,NP}$ , was evaluated according to the following equation, derived from the correlations reported by Hiraoka et al.:<sup>41</sup>

$$k_{TG,NP} = 0.45 \frac{D_{TG,NP}^{0.666} \rho_c^{0.053} (P_V)^{0.193}}{d_{32}^{0.228} \mu_c^{0.246}} \quad (\text{SI-5})$$

The evaluations of  $k_{TG,NP}$  obtained with eq SI-5 are in very good agreement with those obtained following the alternative approach suggested by Skelland and Moeti.<sup>42</sup>

Finally  $a$ , the specific interfacial area, was evaluated as  $6 \varepsilon_P / d_{32}$ .

### Nomenclature relative to the Supporting Information

|                 |                                                                                                      |
|-----------------|------------------------------------------------------------------------------------------------------|
| $a$             | specific interfacial area referred to the total volume of the two phases ( $\text{m}^2/\text{m}^3$ ) |
| $d_{32}$        | Sauter mean diameter of dispersed phase droplets (m)                                                 |
| $D$             | impeller diameter (m)                                                                                |
| $D_{TG,NP}$     | diffusivity of triglycerides in the non-polar phase ( $\text{m}^2/\text{s}$ )                        |
| $D_{TG,P}$      | diffusivity of triglycerides in the polar phase ( $\text{m}^2/\text{s}$ )                            |
| $K_{TG,P}$      | overall mass-transfer coefficient of triglyceride interfacial transport (m/s)                        |
| $k_{TG,P}$      | mass-transfer coefficient of triglyceride diffusion in the polar (dispersed) phase (m/s)             |
| $k_{TG,NP}$     | mass-transfer coefficient of triglyceride diffusion in the non-polar (continuous) phase (m/s)        |
| $m_{TG}$        | triglyceride partition coefficient between the non-polar and the polar phase (-)                     |
| $M_{TG}$        | average molar mass of the triglycerides (866 g/mol)                                                  |
| $P_V$           | impeller power per unit reactor volume ( $\text{W}/\text{m}^3$ )                                     |
| $s_{TG,P}$      | triglyceride solubility in methanol at 60 °C ( $4 \text{ kg}/\text{m}^3$ )                           |
| $V_{mol,TG}$    | molar volume of the triglycerides ( $\text{m}^3/\text{kmol}$ )                                       |
| $\varepsilon_P$ | volume fraction of the polar (dispersed) phase (-)                                                   |
| $\mu_c$         | viscosity of the continuous phase (Pa s)                                                             |

|             |                                                      |
|-------------|------------------------------------------------------|
| $\mu_{NP}$  | viscosity of the non-polar phase (Pa s)              |
| $\mu_P$     | viscosity of the polar phase (Pa s)                  |
| $\rho_c$    | density of the continuous phase (kg/m <sup>3</sup> ) |
| $\rho_{TG}$ | density of the triglycerides (kg/m <sup>3</sup> )    |
| $\theta$    | temperature (K)                                      |
